# Supplementary material
Source: PubMed Central journal article supplement (PMC3591989)
Supplement: JB.02176-12_zjb999092484so1.pdf [file JB.02176-12_zjb999092484so1.pdf]

## SUPPLEMENTARY MATERIALS AND METHODS

***E. coli* strains, plasmids, and growth conditions.** *Escherichia coli* strain P90C (1)  $\Delta$ *dinB*::kan (lab stock) derivative was used as wild-type. MG1655  $\Delta$ *alkA tag dinB* (2) is the base excision repair-deficient strain (gracious gift of Ivan Matic, Université Paris Descartes). Plasmids used in this study include: pVector (pWKS30, (3)), pEc-*dinB*<sup>native</sup> (pYG768, (4)), pEc-*dinB*<sup>lac</sup> (pYG782, (4)); pAb-*dinB*<sup>native</sup> and pAb-*dinB*<sup>lac</sup> were constructed for this work. *E. coli* strains were routinely grown in Luria broth (LB) and supplemented with 200  $\mu$ g/mL ampicillin (Ap; Sigma) for plasmid maintenance.

**Construction of pAb-*dinB*<sup>lac</sup>.** *Acinetobacter baumannii dinB* (gene locus A1S\_0186) from strain ATCC 17978 was amplified by PCR using the oligonucleotides 5'-ATG CGC AAA ATC ATT CAT ATC G-3' and 5'-TTA CCA TAA GGA CAA CTG AAA GTC G-3' with Platinum *Taq* DNA polymerase High Fidelity (Life Technologies). The amplification product was purified and ligated into pGEM cloning vector (Promega). The *Pst*I and *Sac*II Ab-*dinB* fragment was subcloned into the low copy number plasmid pWKS30 under the *lac* promoter. The resulting pAb-*dinB*<sup>lac</sup> plasmid was sequenced with M13 forward and reverse oligonucleotides (Tufts Core Facility).

**Construction of pEc-*dinB*<sup>native</sup>.** Site-directed mutagenesis was performed on plasmid pYG768 (contains *E. coli dinB* under its native promoter; (4)) using the Gene-Tailor kit (Life Technologies), according to manufacturer's instructions. Using oligonucleotides 5'-ACC AGT GTT GAG AGG TGA GCT AGC AAT GCG TAA AAT CAT TC-3' and 5'-GCT CA CCT CTC AAC ACT GGT AAA GTA TAC AGT GAT TTC AGG-3', a *Nhe*I restriction site was

inserted between the starting *E. coli dinB* methionine codon and the native promoter region. Resulting plasmid was confirmed by sequencing (Tufts Core Facility) using oligonucleotides 5'-GGG ATA ATT GGC GGT GCT GAT CAC-3' and 5'-CCG GCG CAT TGAG ATT ATG GTG C-3'. The *NheI* restriction site was added so that the *A. baumannii dinB* gene could be inserted into the plasmid directly downstream of the *E. coli dinB* promoter.

**Construction of pAb-*dinB*<sup>native</sup>.** *A. baumannii dinB* was amplified by PCR with oligonucleotides that introduced restriction site *NheI* on the 5' end and *HindIII* on the 3' end of the gene (5' GGG GGC TAG CAA TGC GCA AAA TCA TTC ATA TCG-3', 5'-CTG CAA GCT TTT ACC ATA AGG ACA ACT GAA AGT CG-3'). The amplification product was cloned into the *NheI* and *HindIII* sites of pEc-*dinB*<sup>native</sup>, resulting in Ab-*dinB* directly downstream of the native *E. coli dinB* promoter. The newly constructed plasmid was sequenced (Tufts Core Facility) with 5'-CCG GCG CAT TGA GAT TAT GGT GC-3', 5'-TAA TAC GAC TCA CTA TAG GG-3', 5'-CTC ATG GAC ATG GCA GAG CG-3', and 5'-GCA ACT GAA TGC CCG AGG TG-3'.

***E. coli* Survival Assays and DNA damage treatments.** For survival assays, three independent *E. coli* cultures were grown to saturation. Cultures were serially diluted in SMO and 10  $\mu$ L spots were deposited on LB-Ap agar with methyl methanesulfonate (MMS; Acros Organics), ethyl methanesulfonate (EMS; Acros Organics), or nitrofurazone (NFZ; Sigma) at the concentrations specified in figure legends. NFZ plates were incubated in the dark for 20 hours and MMS plates were incubated for 20-40 hours depending on the strain and concentration.

Percent survival was determined by calculating the fraction of colony forming units (CFUs) grown with the DNA-damaging agent per total number of CFUs grown on LB.

1. **Cairns, J., and P. L. Foster.** 1991. Adaptive reversion of a frameshift mutation in *Escherichia coli*. *Genetics* **128**:695-701.
2. **Bjedov, I., C. N. Dasgupta, D. Slade, S. Le Blastier, M. Selva, and I. Matic.** 2007. Involvement of *Escherichia coli* DNA polymerase IV in tolerance of cytotoxic alkylating DNA lesions in vivo. *Genetics* **176**:1431-1440.
3. **Wang, R. F., and S. R. Kushner.** 1991. Construction of versatile low-copy-number vectors for cloning, sequencing and gene expression in *Escherichia coli*. *Gene* **100**:195-199.
4. **Kim, S. R., G. Maenhaut-Michel, M. Yamada, Y. Yamamoto, K. Matsui, T. Sofuni, T. Nohmi, and H. Ohmori.** 1997. Multiple pathways for SOS-induced mutagenesis in *Escherichia coli*: an overexpression of *dinB/dinP* results in strongly enhancing mutagenesis in the absence of any exogenous treatment to damage DNA. *Proc Natl Acad Sci U S A* **94**:13792-13797.



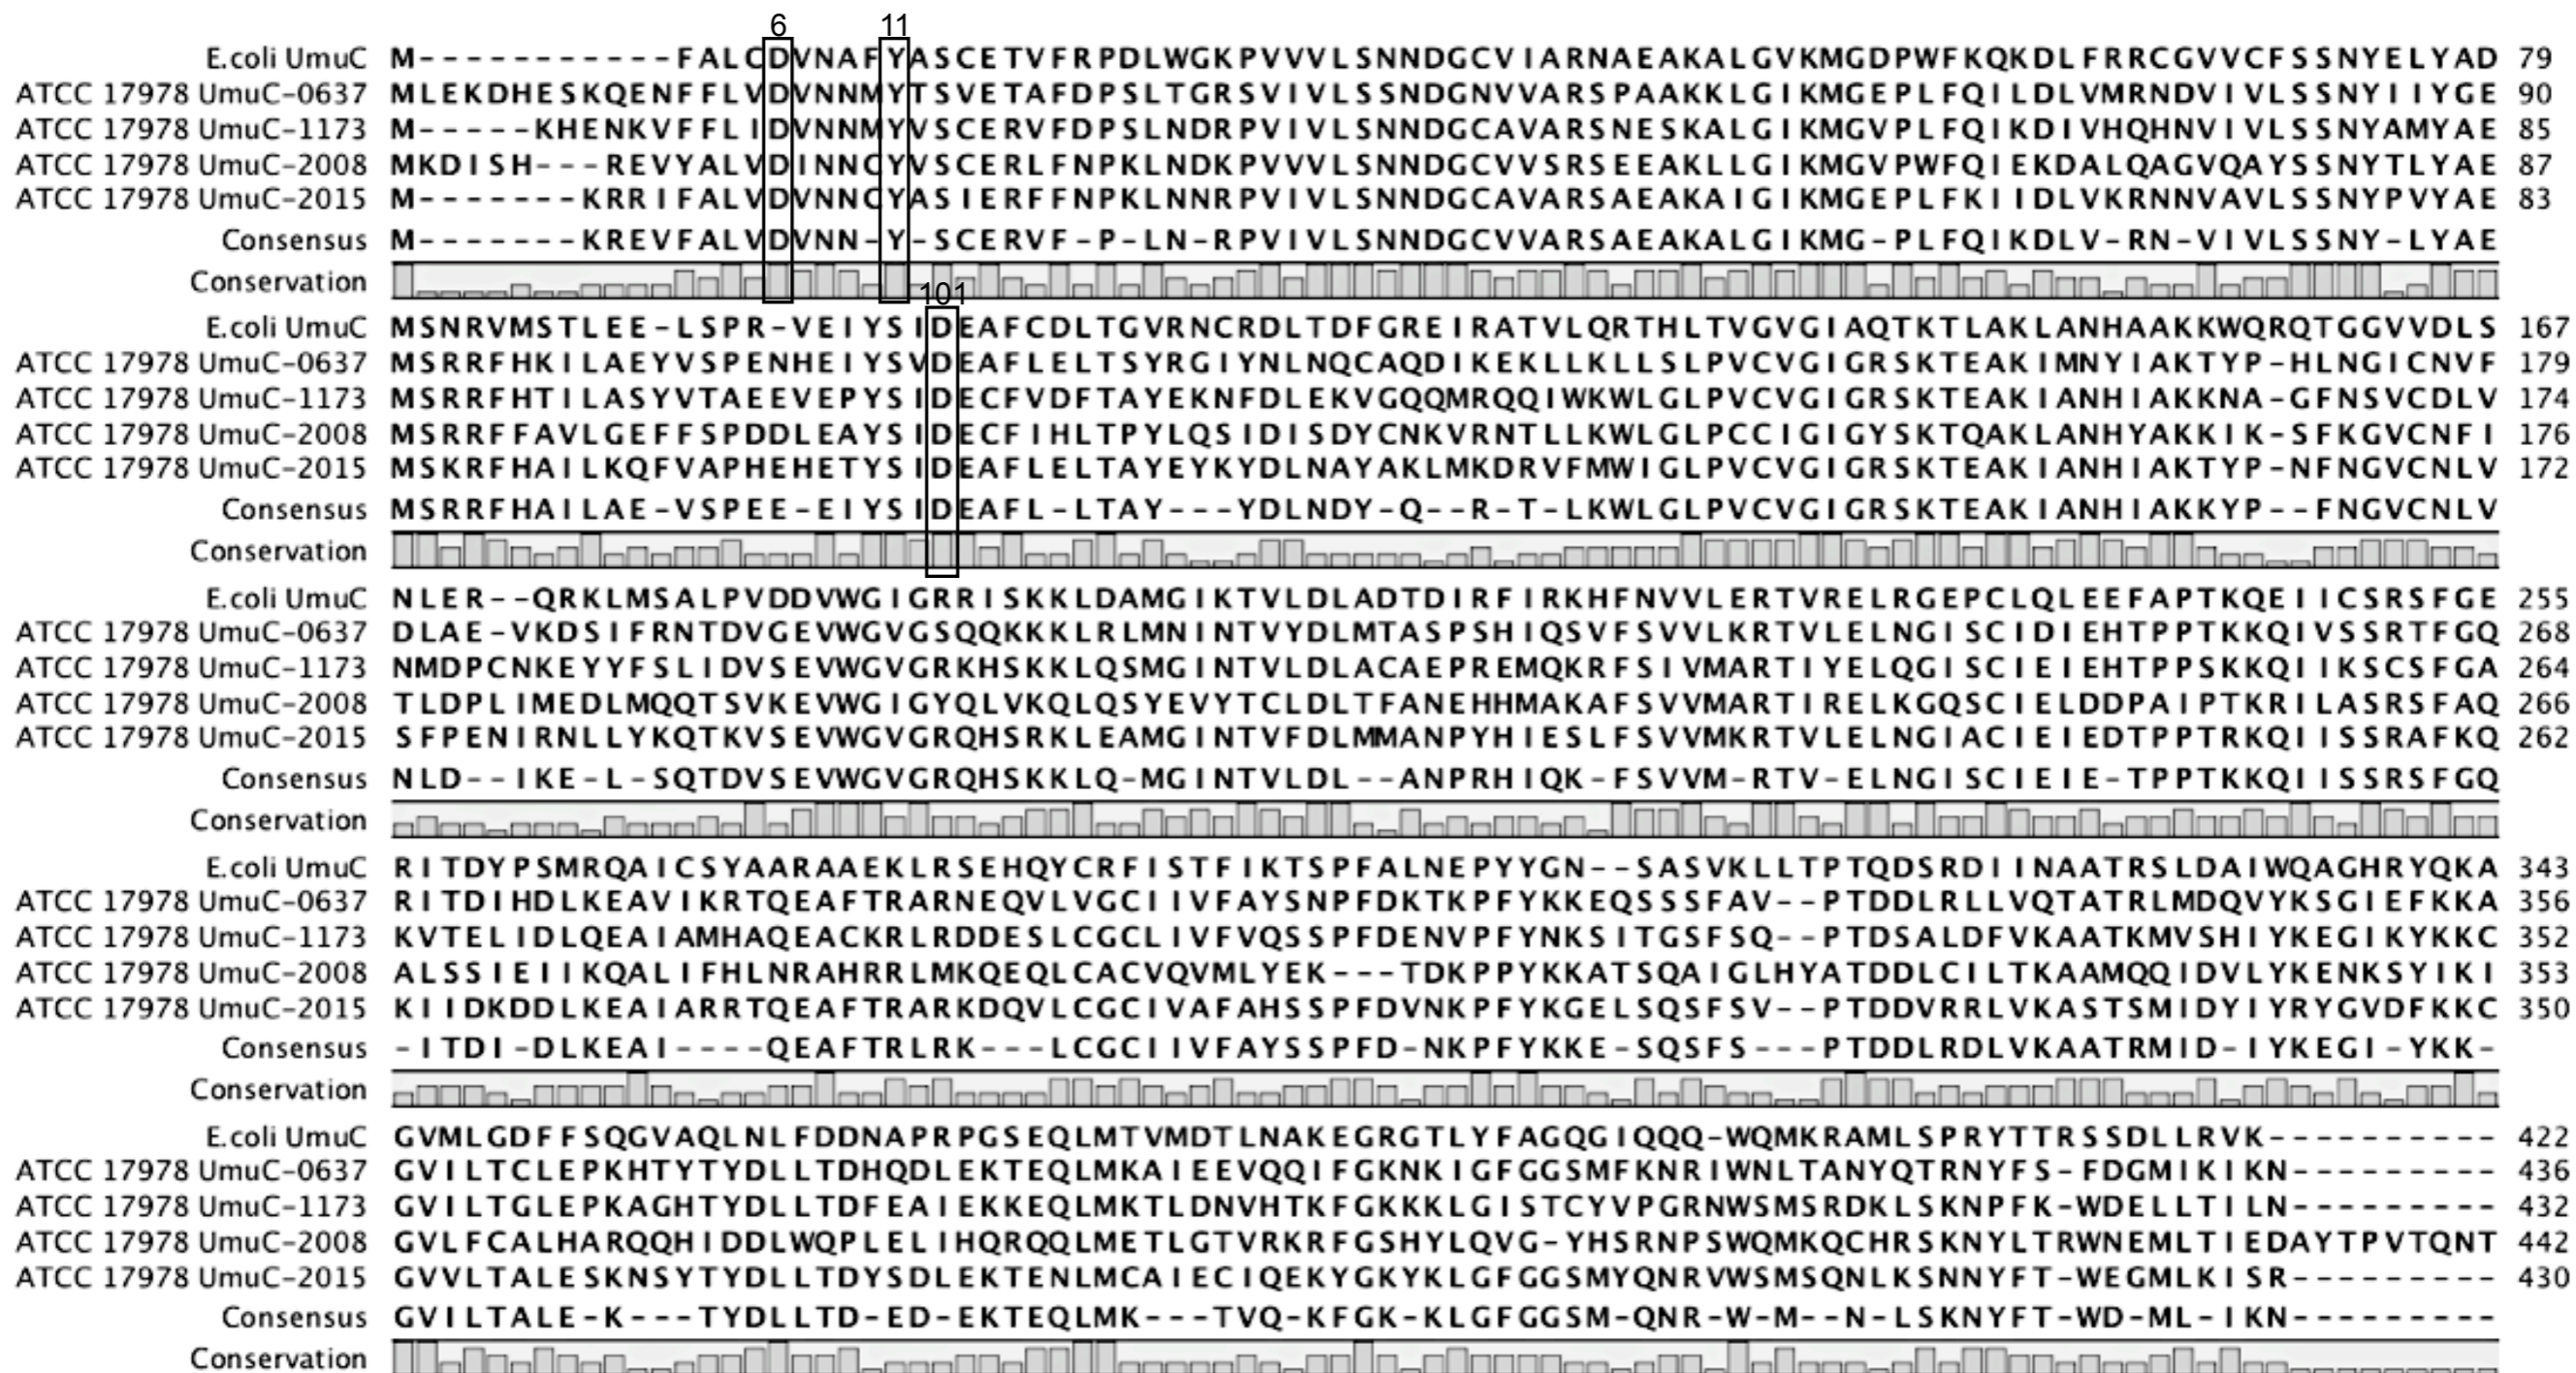

**Figure S2. Predicted UmuC proteins from *A. baumannii* 17978 are similar to *E. coli* UmuC.** Full alignment of 17978 UmuC sequences with *E. coli* UmuC. Conserved catalytic residues are highlighted in boxes. Bar graph represents conservation with full bars as 100%. Dashes in overall consensus sequence represent ambiguity. E values are all less than or equal to  $7 \times 10^{-82}$ . Alignment was generated using the CLC Main Workbench (CLC Bio).

A

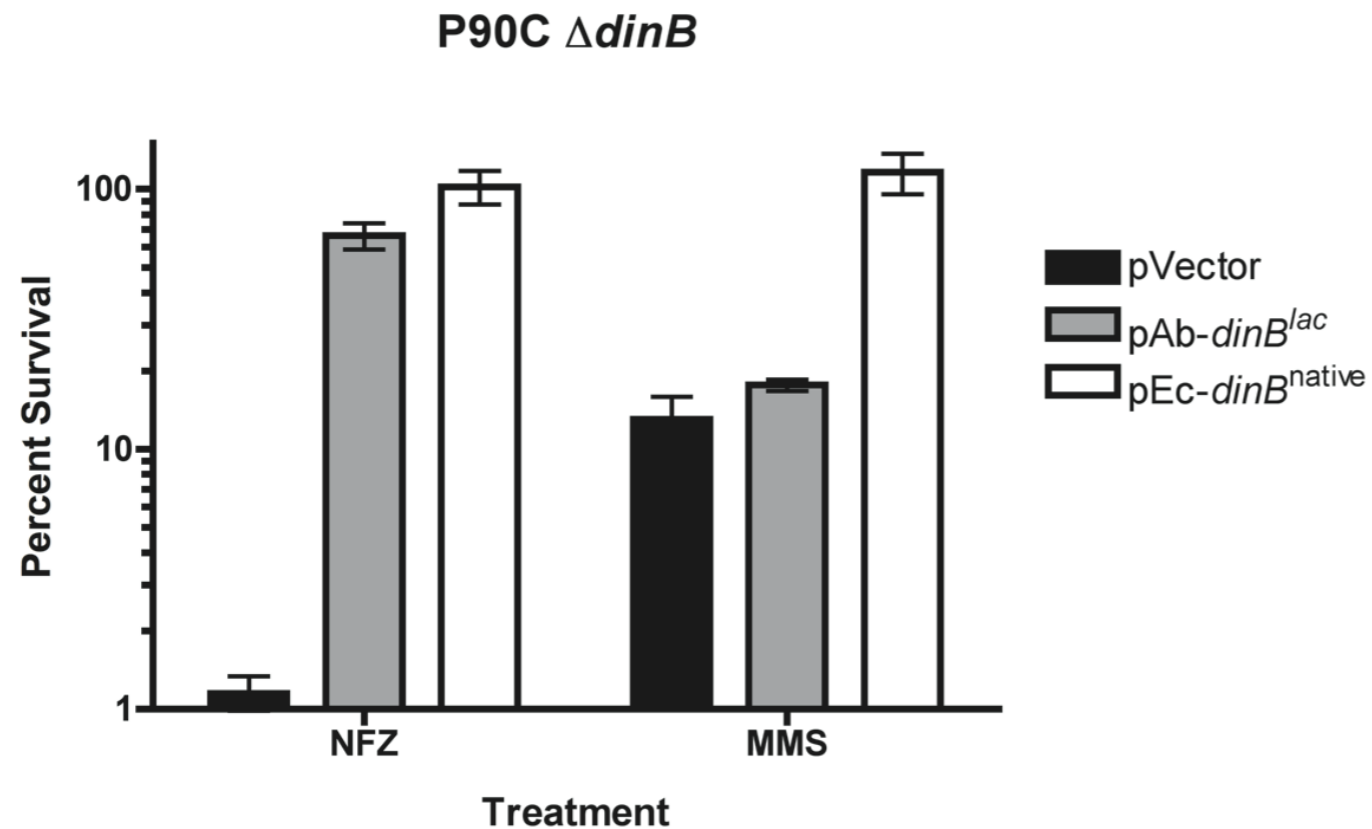

B

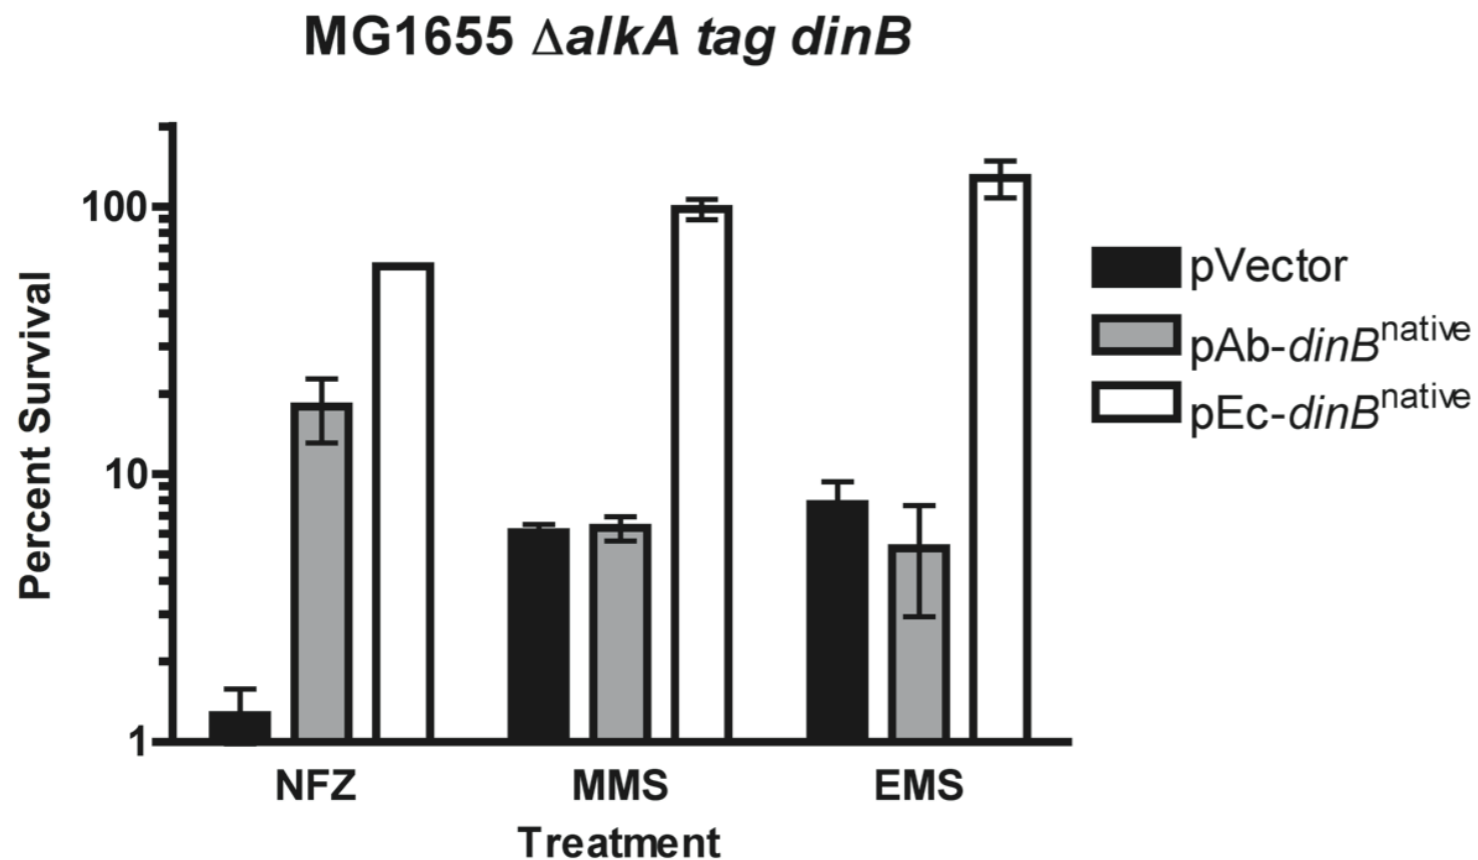

**Figure S3. Plasmid-borne *A. baumannii dinB* complements certain phenotypes of *dinB*-deficient *E. coli*.** (A) Wild-type P90C  $\Delta dinB$  cells bearing *A. baumannii* 17978 *dinB* on a plasmid (pAb-*dinB*<sup>lac</sup>) are rescued as well as those with *E. coli dinB* (pEc-*dinB*) upon nitrofurazone (NFZ) treatment. There is no rescue of  $\Delta dinB$  strains upon methyl methanesulfonate (MMS) treatment. Ab-*dinB* expression is driven by the *lac* promoter and Ec-*dinB* expression is driven by its native promoter. Percent survival was determined by calculating the fraction of colony forming units (CFUs) that grew on LB medium supplemented with NFZ (7.5  $\mu$ M) or MMS (7.5 mM) per total number of untreated CFUs. (B) Similar results are found using MG1655  $\Delta alkA tag dinB$ , an *E. coli* strain deficient in base-excision repair, using pAb-*dinB*<sup>native</sup> (expression driven by the *E. coli dinB* native promoter) and pAb-*dinB*<sup>lac</sup> (not shown). In addition to MMS, there is no rescue of strains upon ethyl methanesulfonate (EMS) treatment. P90C  $\Delta dinB$  cells were not sensitive to EMS. Percent survival was calculated as described in (A) using NFZ (5  $\mu$ M), MMS (0.08 mM), or EMS (3.4 mM). Error bars represent the standard deviation of the mean from 3 independent experiments for both graphs.
